# Supplementary material
Source: Research Square preprint supplement (doi:10.21203/rs.3.rs-9468852/v1)
Supplement: Supplementary file 1 [file 2395836420d819795ffe364d.docx]

# Appendix


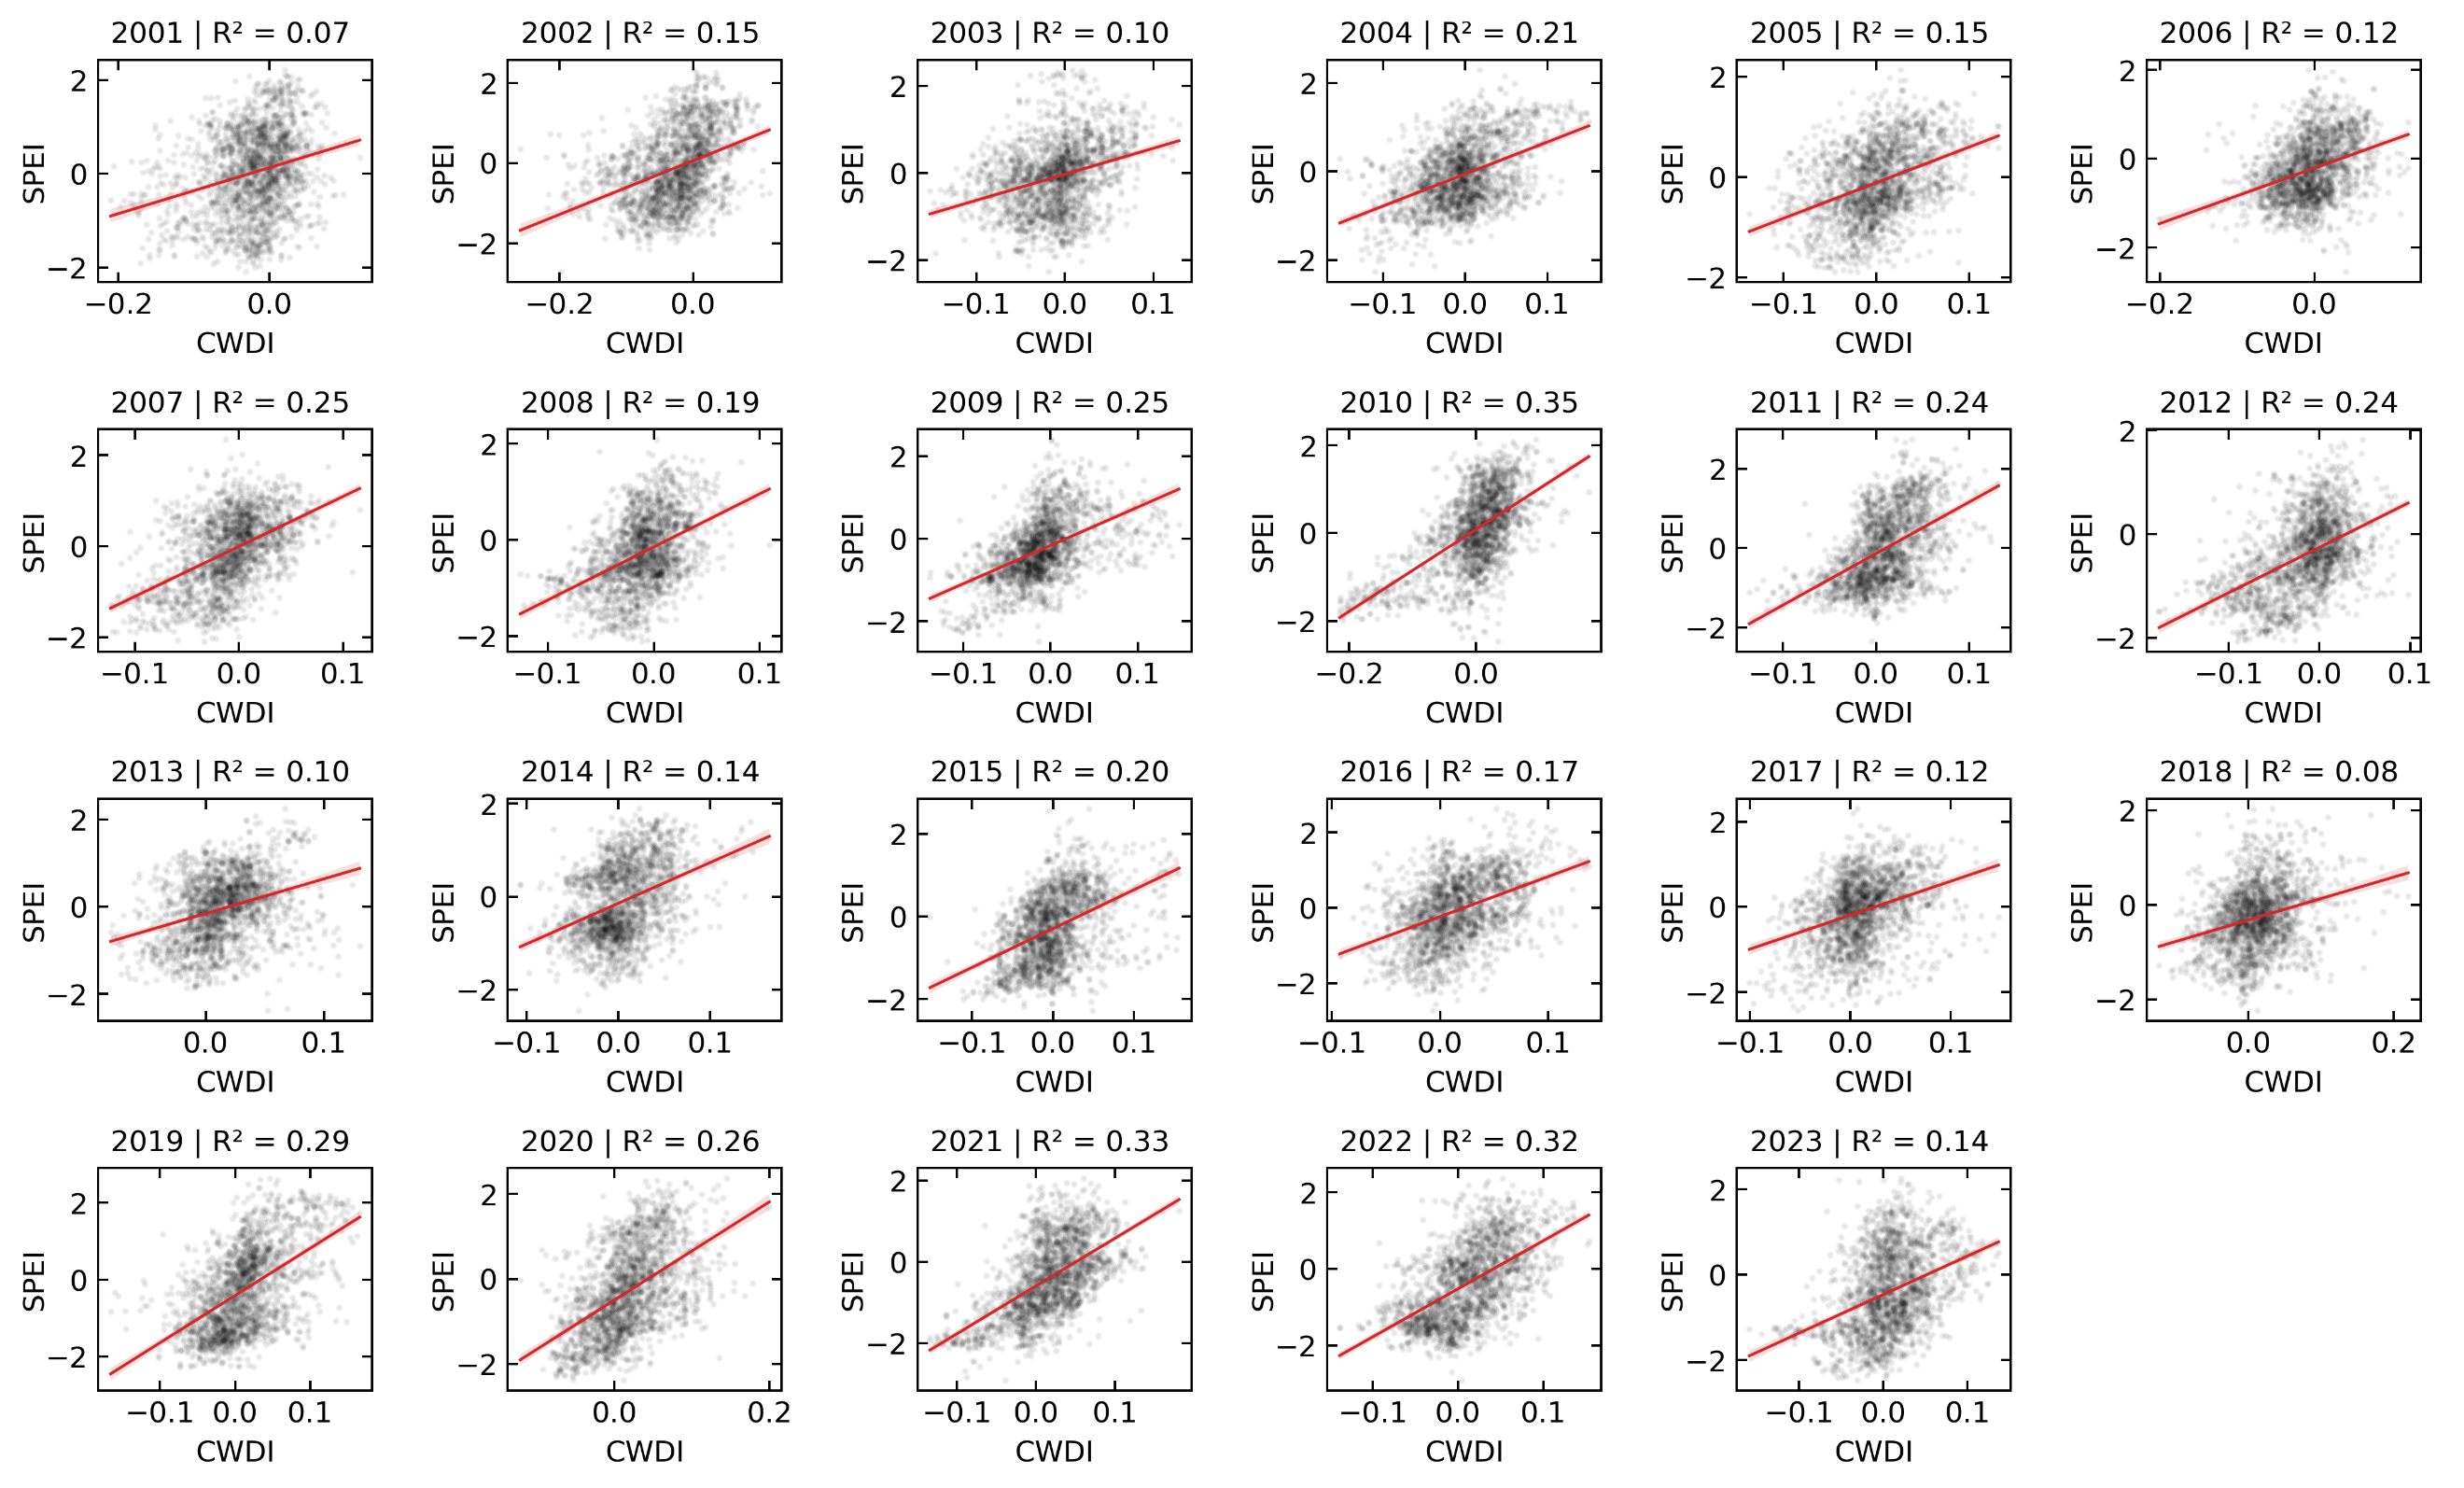


Figure 4. Interannual CWDI – SPEI relationships (2001 - 2023).


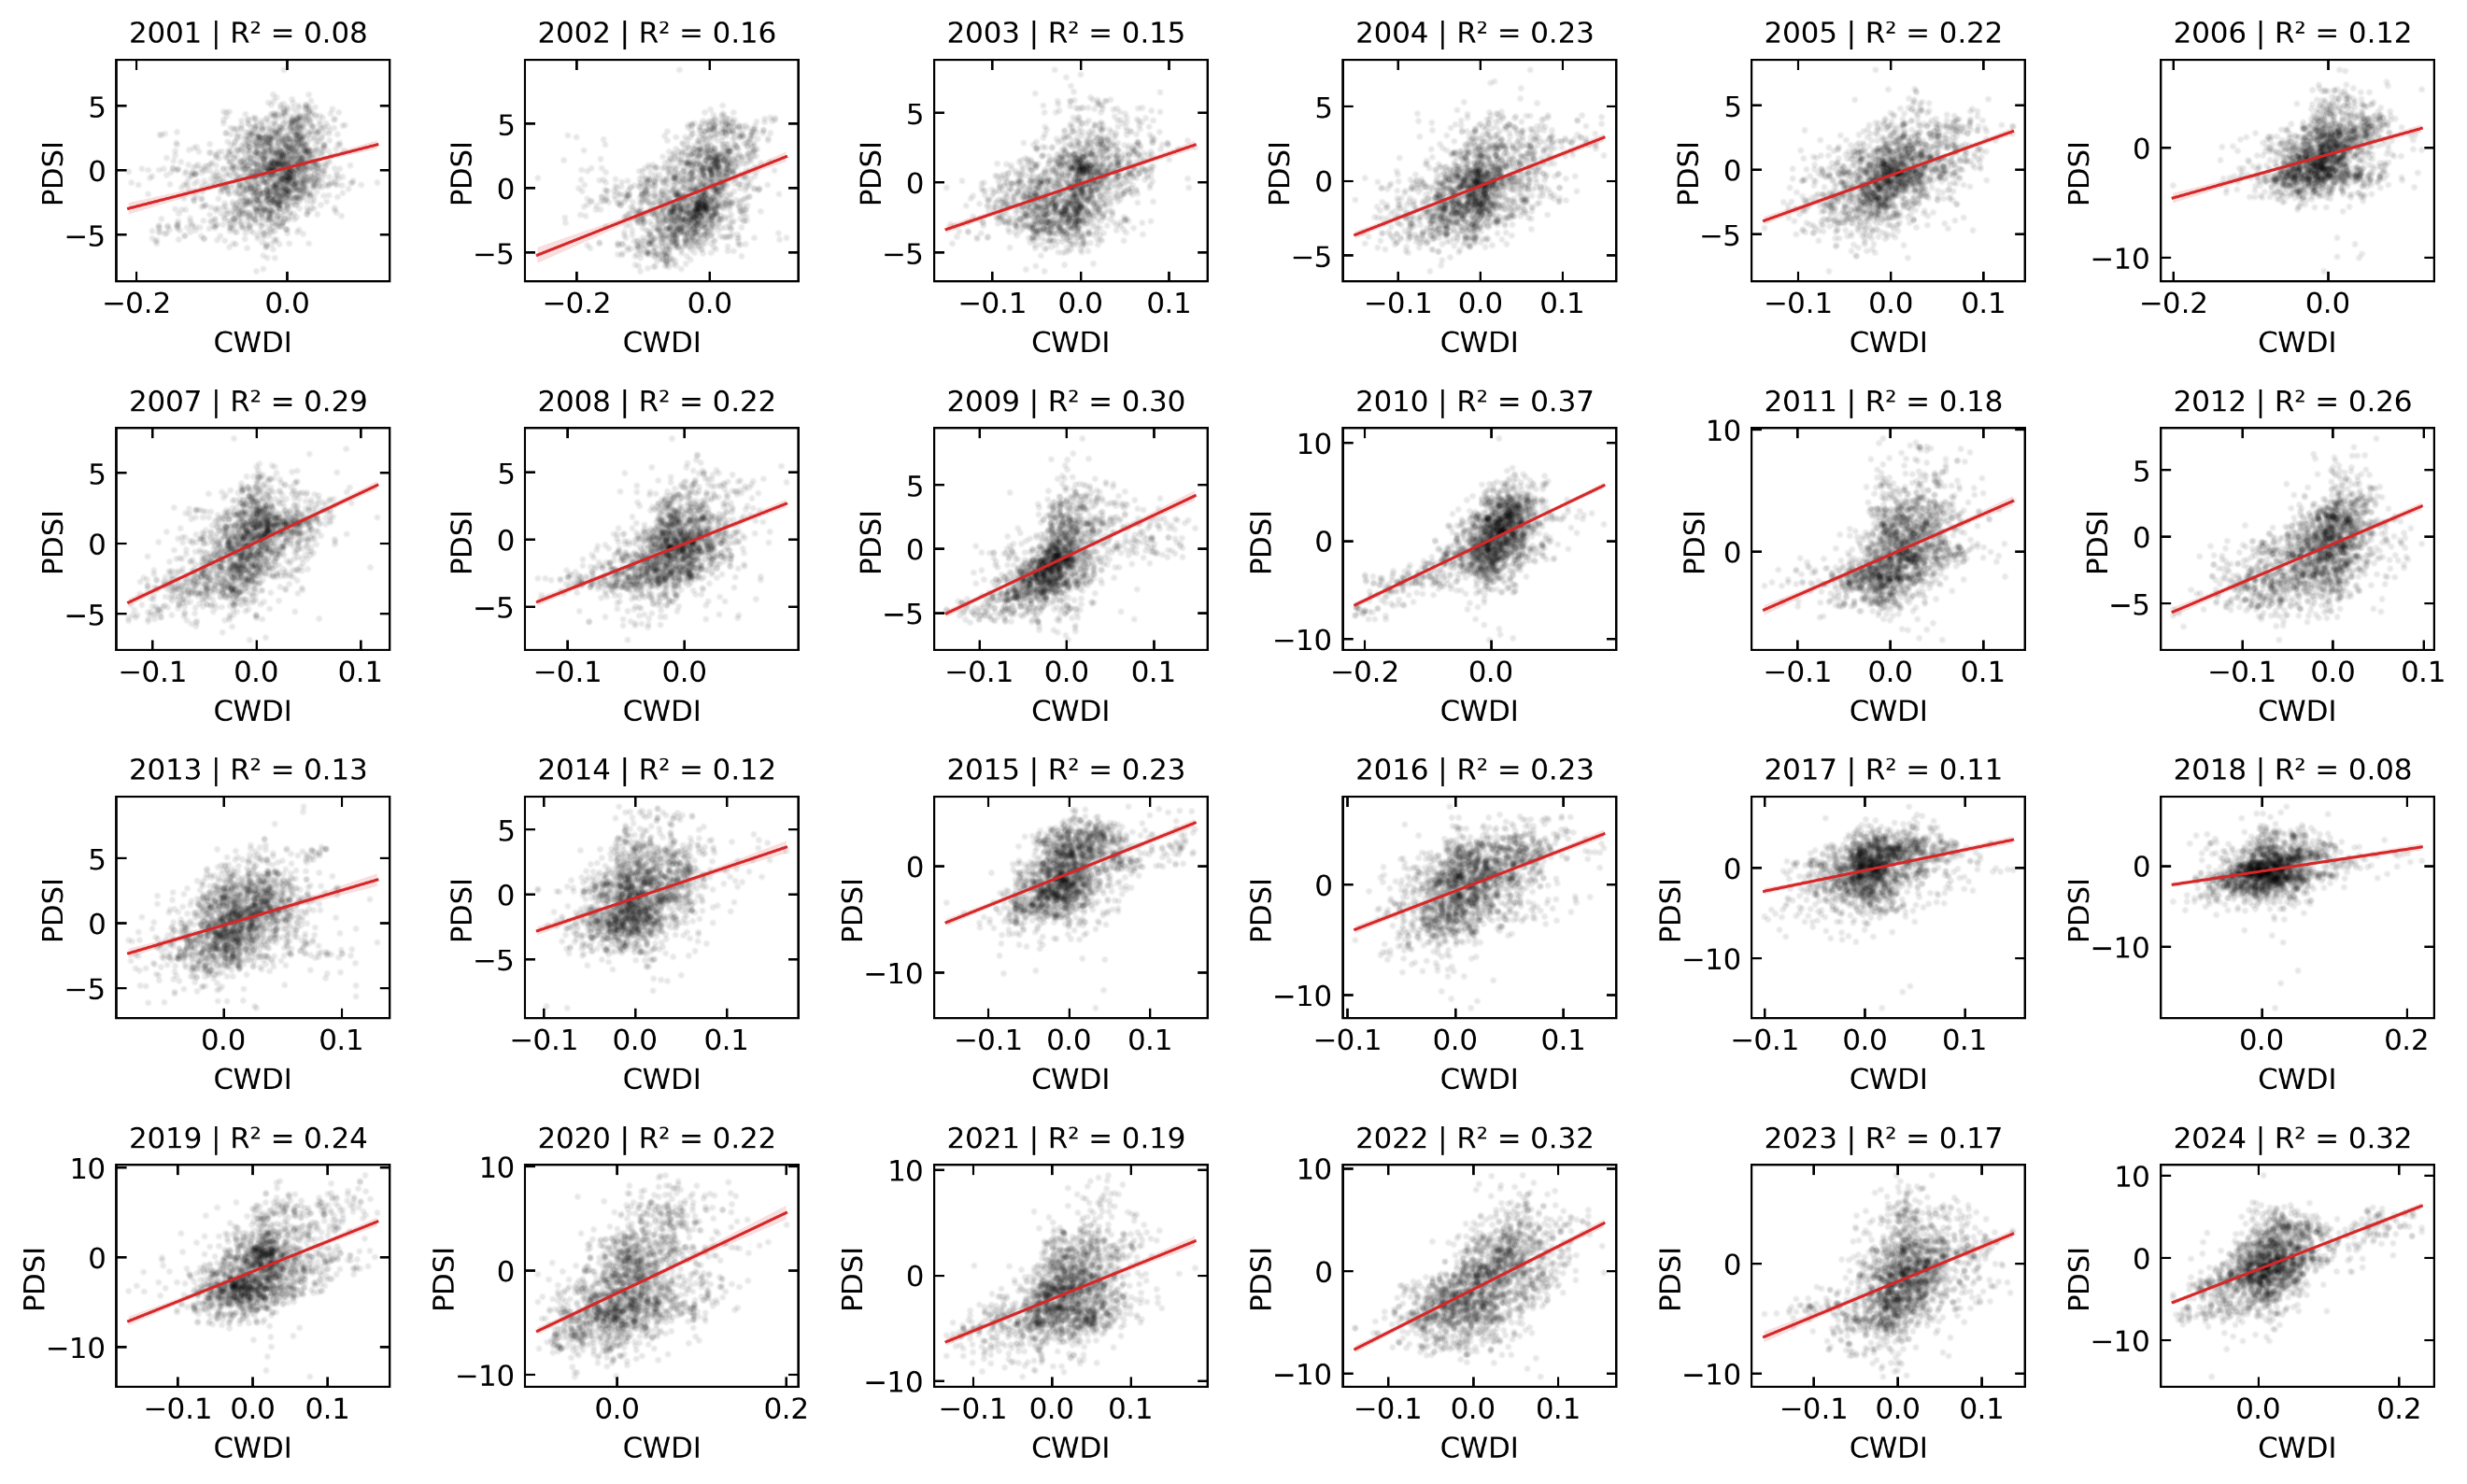


Figure 5. Interannual CWDI – PDSI relationships (2001 - 2024).


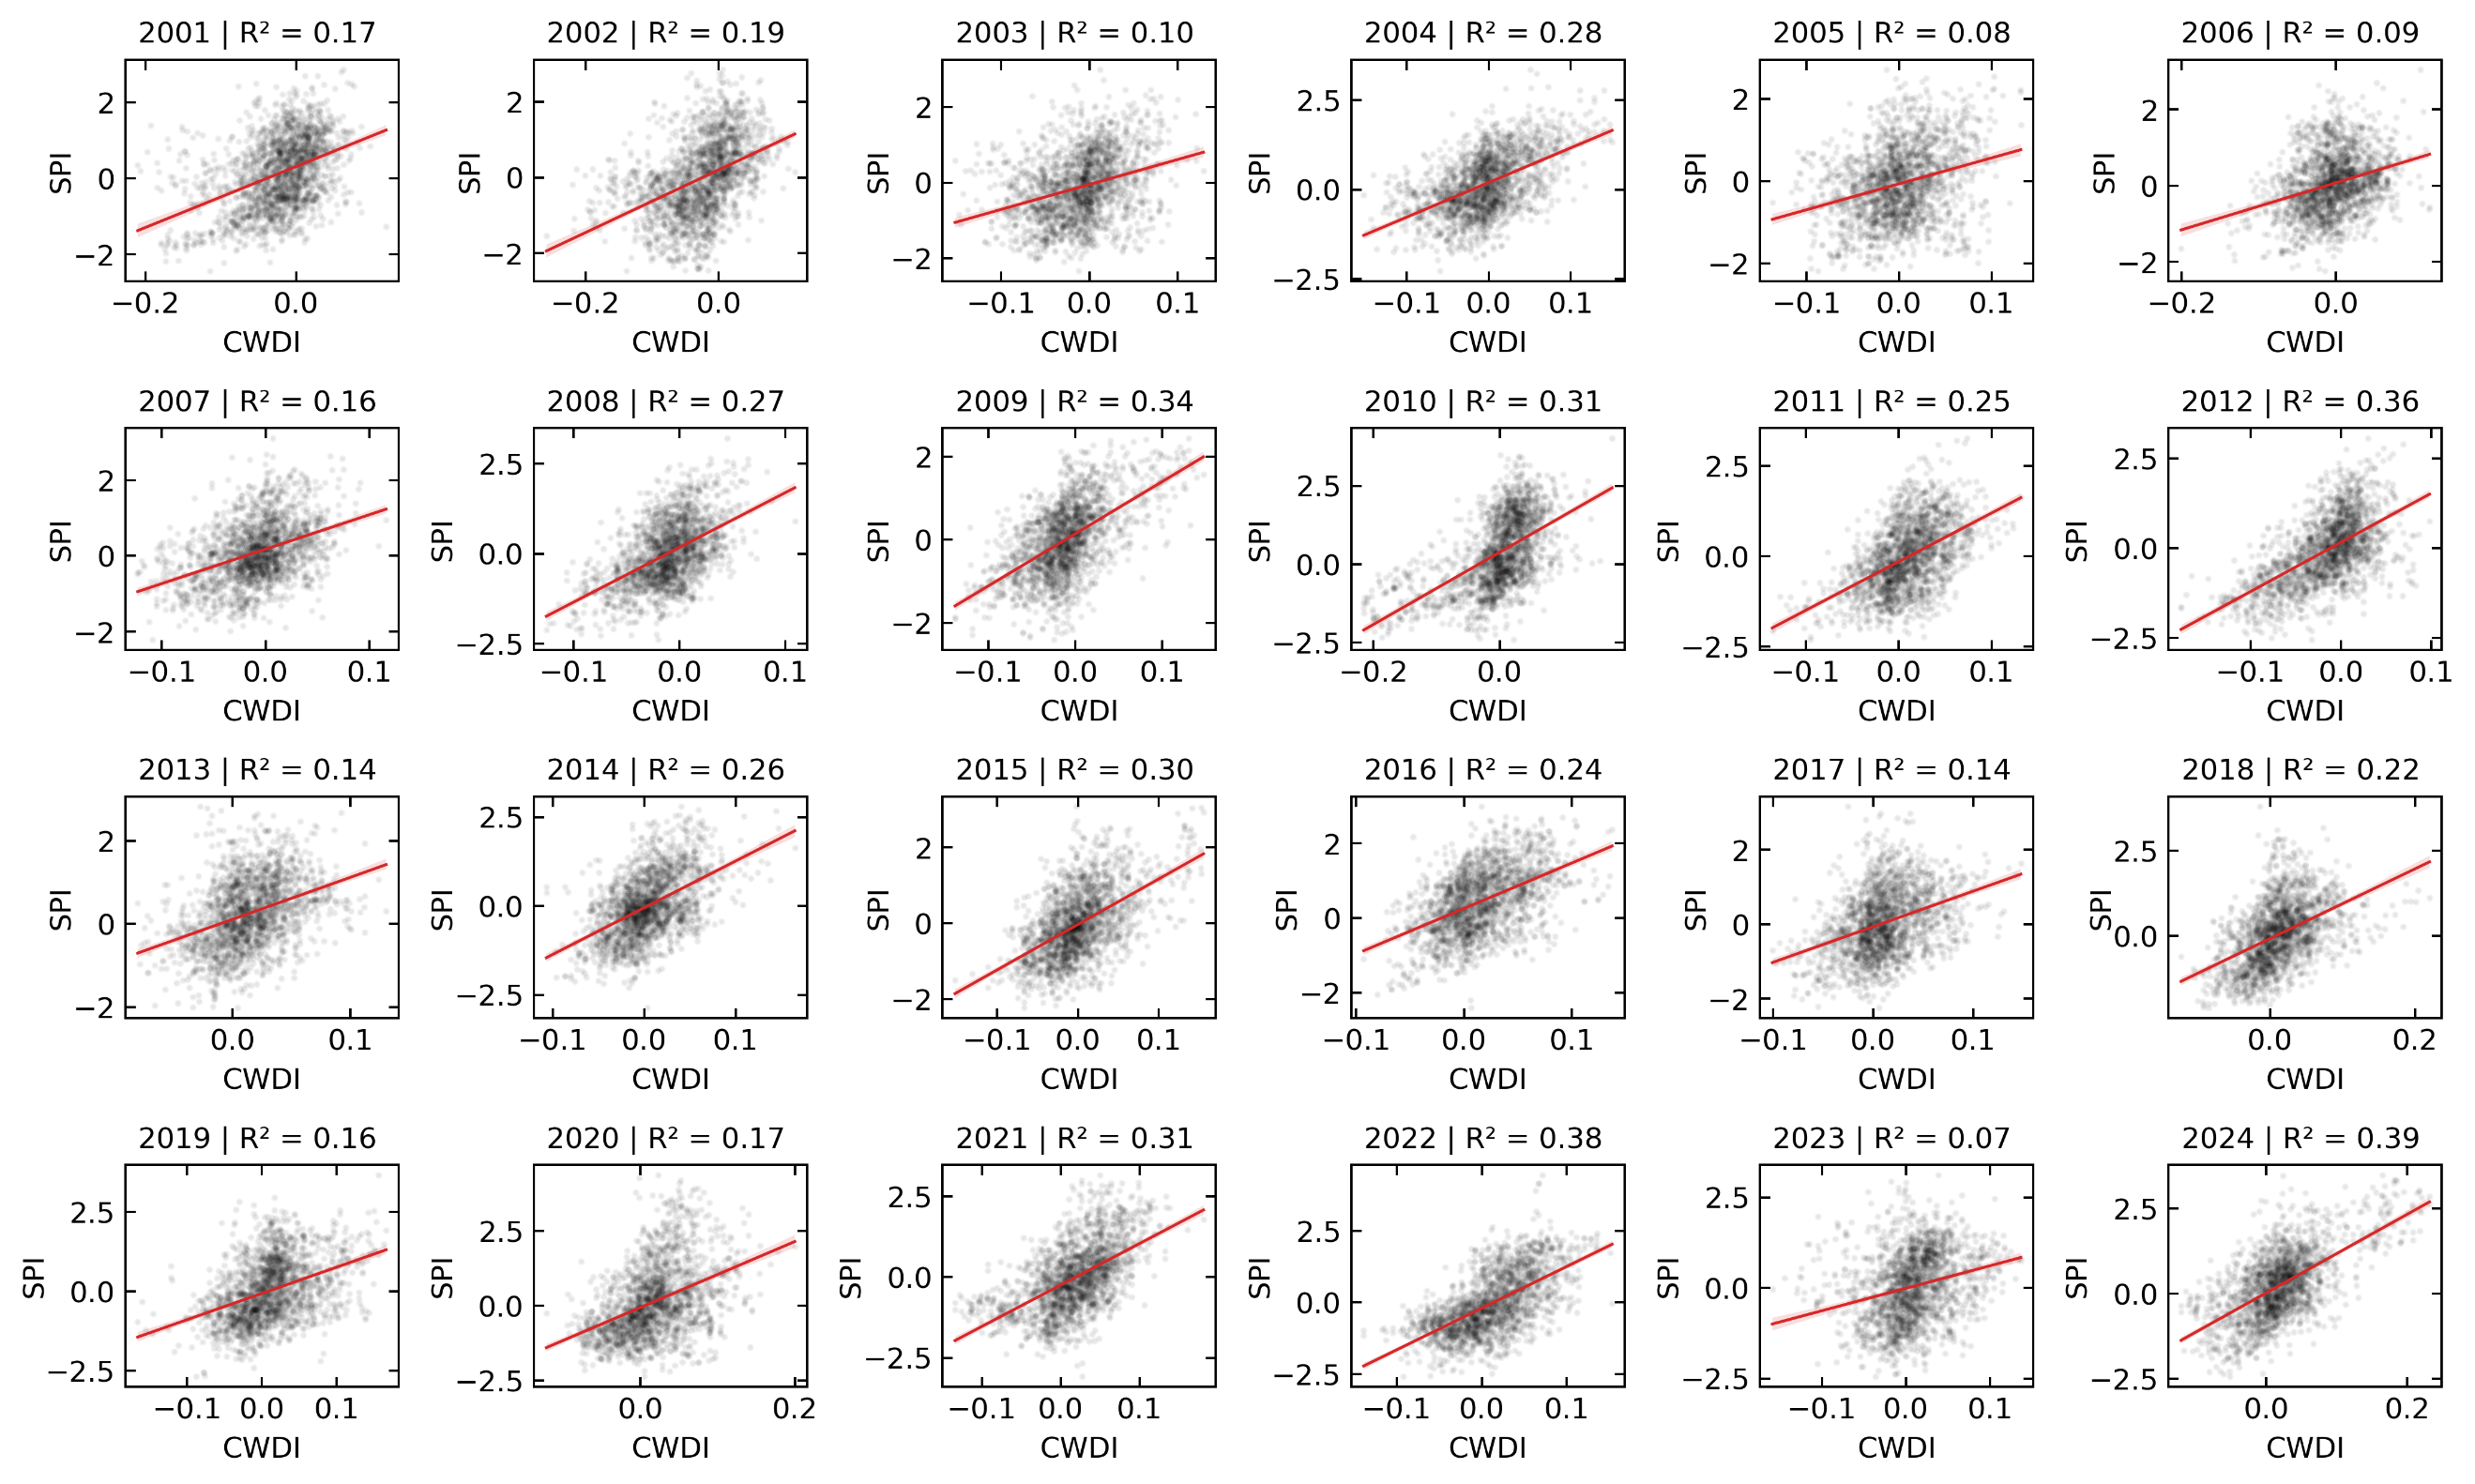


Figure 6. Interannual CWDI – SPI relationships (2001 - 2024).
